# Supplementary figures and images for: Systematic Construction and Validation of an Immune‐Related Gene‐Based Model to Predict Prognosis for Ovarian Cancer
Source: Hindawi journal article supplement (doi:10.1155/2022/7356992), 2022-01-01

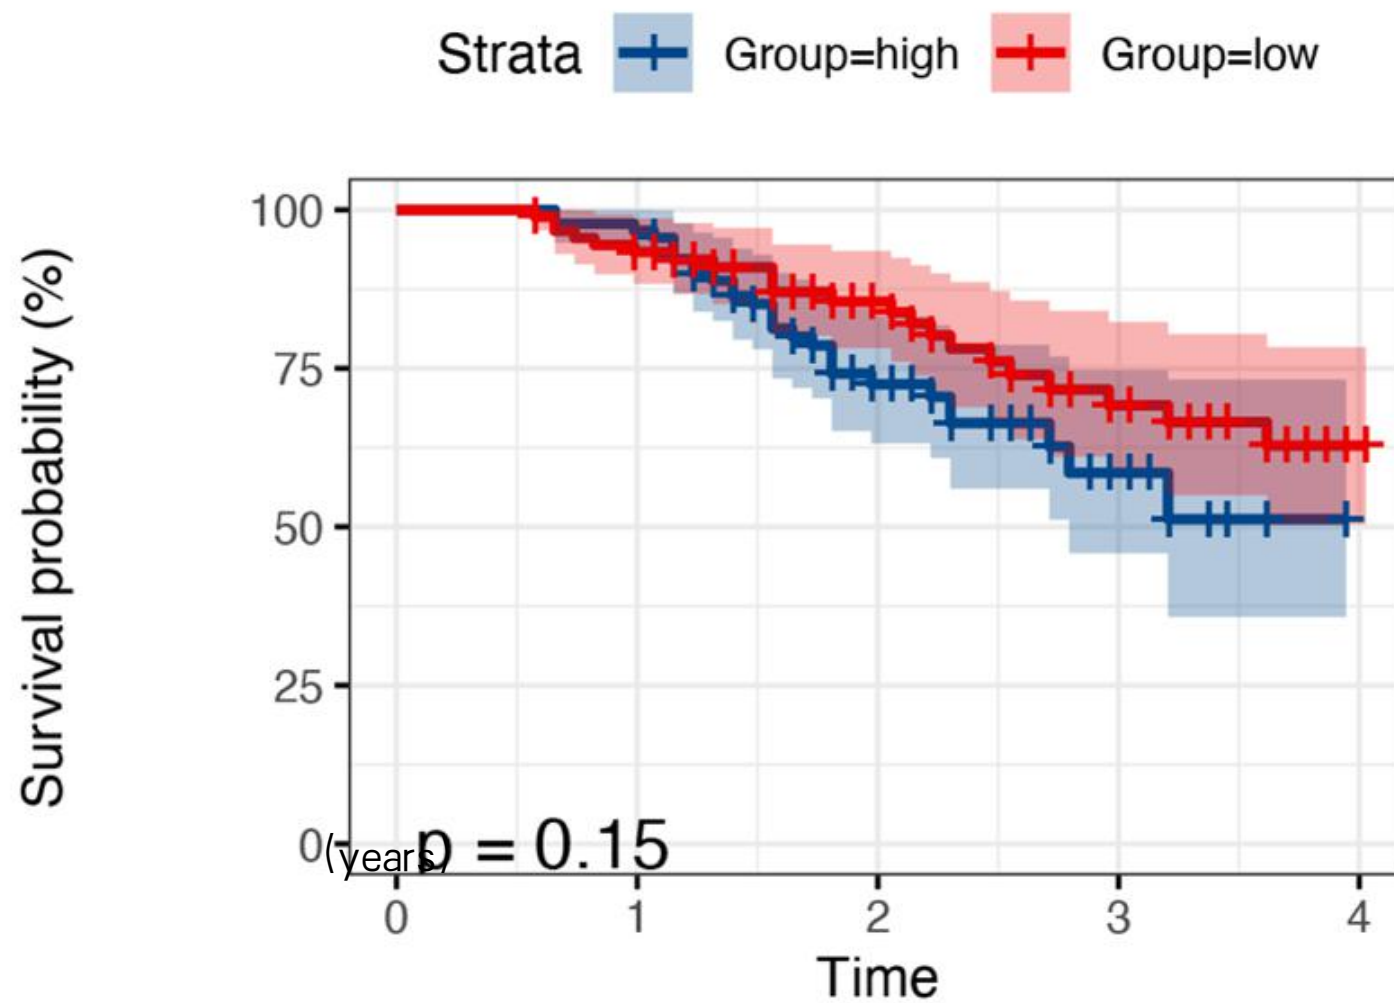

Supplement: f1 [file 7356992.f1.zip]

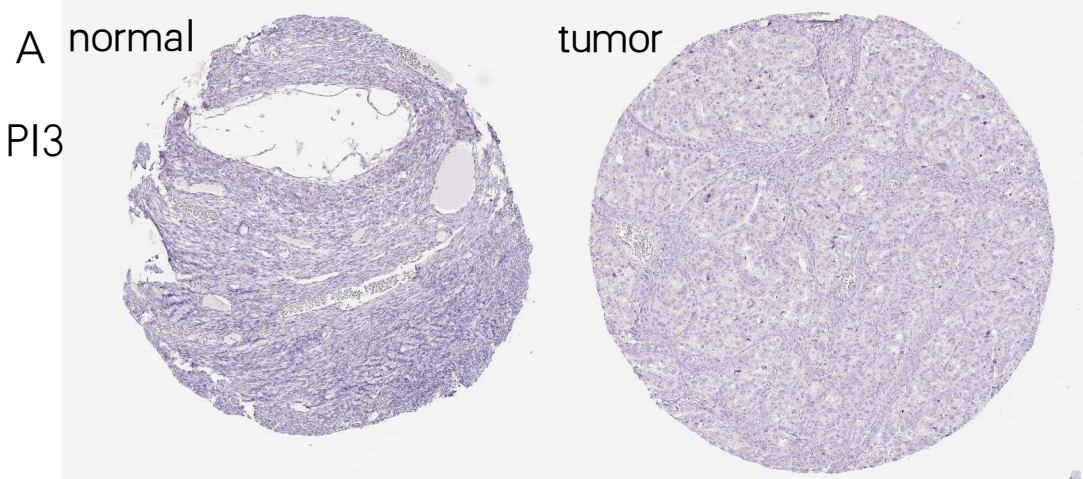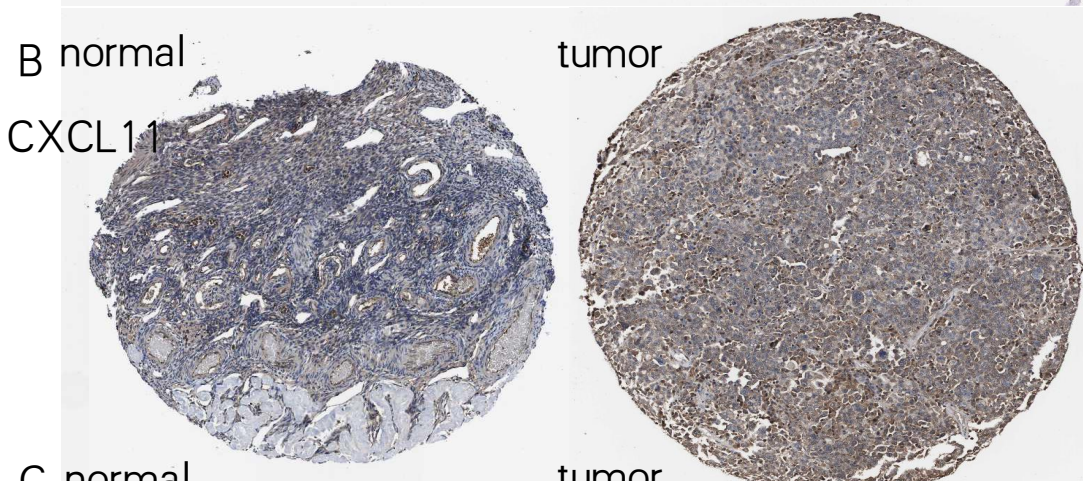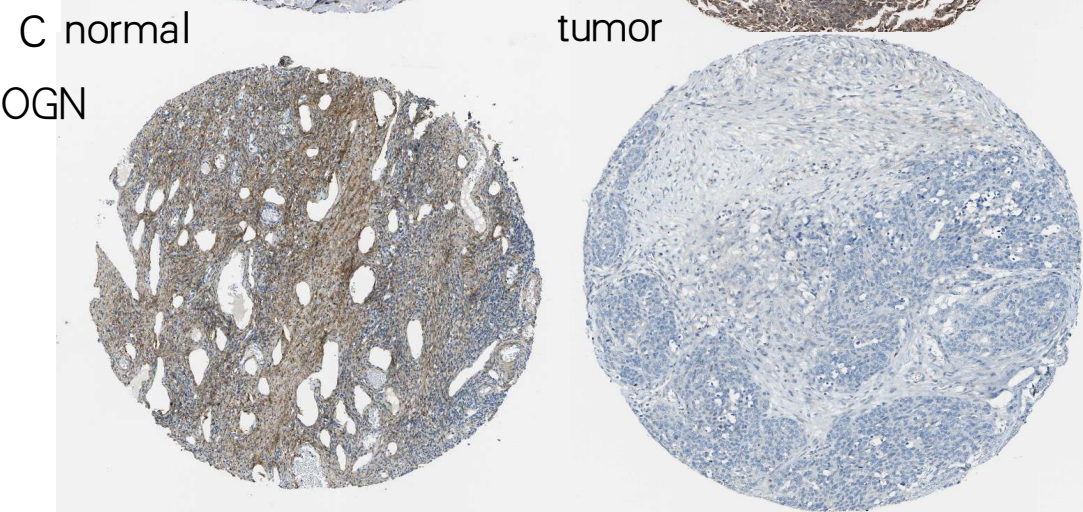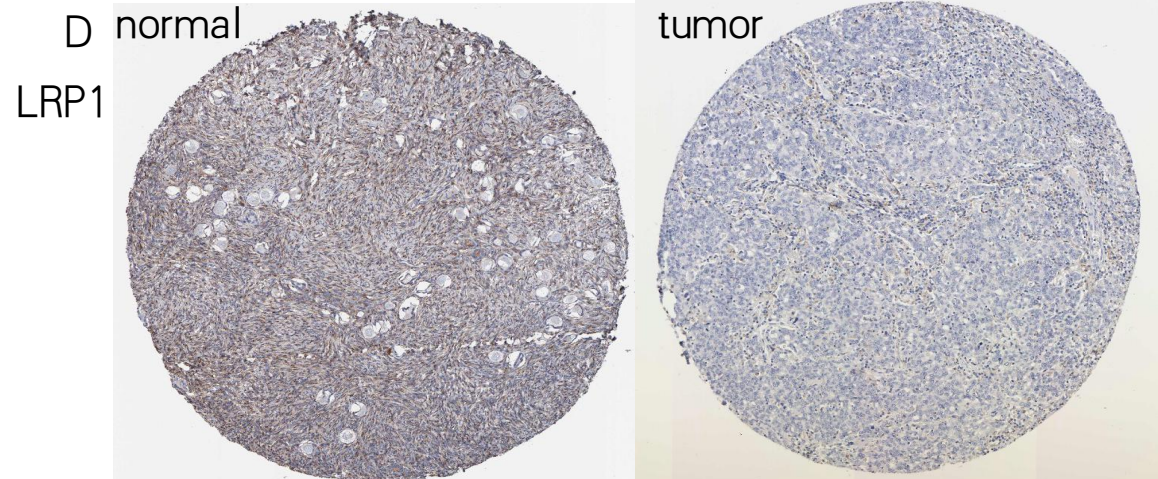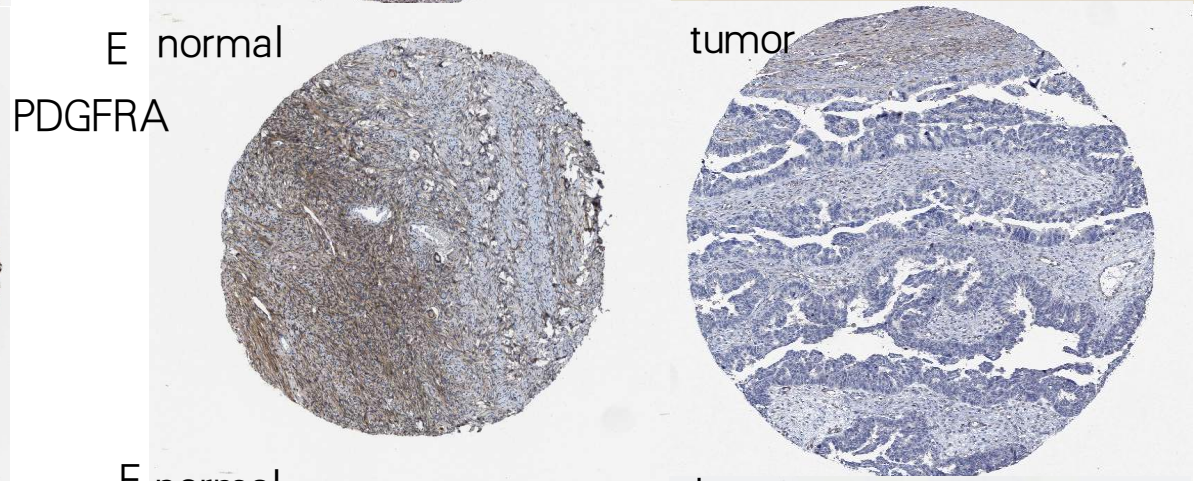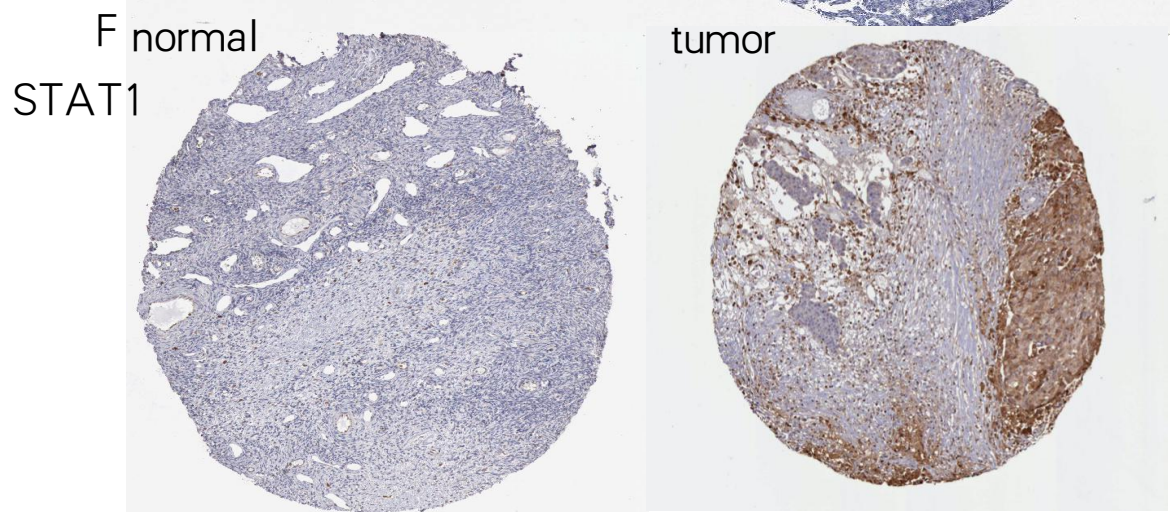

Supplement: f1 [file 7356992.f1.zip]
